Anesthesiology  
75:710, 1991

*In Reply:*—The thoughtful comments of Daly and Seravalli provide an opportunity for me to correct their misunderstanding of my article. I articulated several reasons why I believe it is generally in the best interest of both patients and their physicians to suspend do-not-resuscitate (DNR)-orders during anesthesia and surgery. Nevertheless, "with the increasing recognition of the autonomy of the competent patient in medical decision-making, it would be inappropriate not to seek the patient's guidance and provide as much latitude as possible within the constraints of the physician's own ethical standards." I specifically rejected the increasingly common practice of making the suspension of DNR orders during anesthesia and surgery a matter of hospital policy.

The Children's Hospital of Boston is currently considering a more flexible policy, as follows, that reflects these points and further illustrates my position.

#### MANDATORY REASSESSMENT OF DNR ORDERS BEFORE ANESTHESIA AND SURGERY

Patients with DNR orders may be appropriate candidates for anesthesia and surgery, often for procedures intended to facilitate care or relieve pain. The etiologies and outcomes of cardiopulmonary arrest during anesthesia are sufficiently different from those in nonsurgical settings that reevaluation of the DNR order is always necessary. The fact that cardiopulmonary arrest is more likely to be reversible when it occurs during anesthesia will often mean that it is in the patient's best interest to have the DNR order suspended during the intraoperative and immediate postoperative periods. In addition, since the administration of anesthesia almost always involves some degree of resuscitation, many anesthesiologists believe that DNR orders are inherently incompatible with the practice of anesthesiology.

For some patients, however, suspension of a DNR order during surgery and the immediate postoperative period may not be in their best interest. In addition, there may be some patients who do not want to be resuscitated under any circumstances. Anesthesiologists must de-

cide on an individual basis whether they are willing to provide care under these circumstances.

Therefore, it is the responsibility of the anesthesiologist, in conjunction with the attending physician, to discuss these issues with the patient and/or family to determine whether the DNR order should be suspended during anesthesia and surgery. If the patient elects to have the DNR order suspended, the anesthesiologist should inform the patient's surgeon, document the decision in the medical record, and convey the decision to those who will be involved with the patient's care during the intraoperative and immediate postoperative period. The anesthesiologist must also coordinate with the patient's caregivers and document in the medical record the time when the DNR order is to be reinstated.

If the patient elects to have the DNR order remain in effect, the anesthesiologist and any other caregivers have the option of declining to participate in the case. Should the anesthesiologist decline to participate, he or she must make every reasonable effort to find an anesthesiologist who is willing to treat the patient.

The anesthesiologist should discuss with the patient which interventions will be undertaken in the event of a cardiopulmonary arrest, and document both the discussion and the specific interventions in the medical record. Explicit agreement must be reached concerning the use of chest compressions, endotracheal intubation, mechanical ventilation, and vasopressors. In addition, if regional anesthesia is to be used, the circumstances (if any) under which the above interventions will be performed must be clearly documented in the medical record.

ROBERT D. TRUOG, M.D.  
*Assistant Professor of Anaesthesia (Pediatrics)*  
*Harvard Medical School*  
*Department of Anesthesia*  
*Children's Hospital*  
*MICU Office / Farley 517*  
*300 Longwood Avenue*  
*Boston, Massachusetts 02115*

(Accepted for publication July 11, 1991.)

Anesthesiology  
75:710-711, 1991

#### Pressure-Rate Quotient in Patients Undergoing Coronary Artery Bypass Graft Surgery

*To the Editor:*—In their recent study,<sup>1</sup> Gordon and co-workers evaluated the ability of the pressure-rate quotient (PRQ = mean arterial pressure/heart rate) to predict or to indicate myocardial ischemia in a population of 60 patients undergoing elective coronary artery bypass graft surgery. They concluded that the PRQ is a poor predictor.

The PRQ concept was developed in a canine model of myocardial ischemia produced by a rigid coronary stenosis<sup>2</sup> and is likely best applied in patients with stable, nondynamic coronary lesions. A proportion of Gordon *et al.*'s subjects may have been outside this category: four of the nine patients with ischemic episodes had ischemia on arrival in the operating room, an indication of unstable coronary artery disease. Unstable angina is caused by dynamic events involving thrombus formation and coronary artery spasm at the site of a deteriorating atherosclerotic plaque.<sup>3</sup> These dynamic events cause primary reductions in coronary blood flow and "nonhemodynamic" ischemia. Since no hemodynamic

index or value can predict ischemia in this subset of patients, the inclusion of such patients would bias Gordon *et al.*'s study toward negative results.

The conclusion that the PRQ is a poor predictor and indicator of intraoperative ischemia is based in large part on a strikingly low "positive predictive value," the likelihood that a PRQ less than 1.0 mmHg·min·beat<sup>-1</sup> is associated with ischemia. Despite acceptable sensitivity and specificity (85 and 91%, respectively) in the subjects with good left ventricular function, the low frequency of ischemia in association with a high false positive rate combined to produce a low positive predictive value.<sup>4</sup> I would argue that sensitivity and specificity are better tests of the PRQ concept than is positive predictive value; however, since a hit (true positive indicating ischemia) is of more clinical importance than a miss (false positive). The authors' own data (their Fig. 6) show that ischemia decreased as PRQ increased. This finding
